# Supplementary material
Source: publisher site journal article supplement (https://www.dovepress.com/article/supplementary_file/586432/586432%20Revised%20Supplementary%20Material.docx)
Supplement: Supplementary file 1 [file 586432%20Revised%20Supplementary%20Material.docx]

**
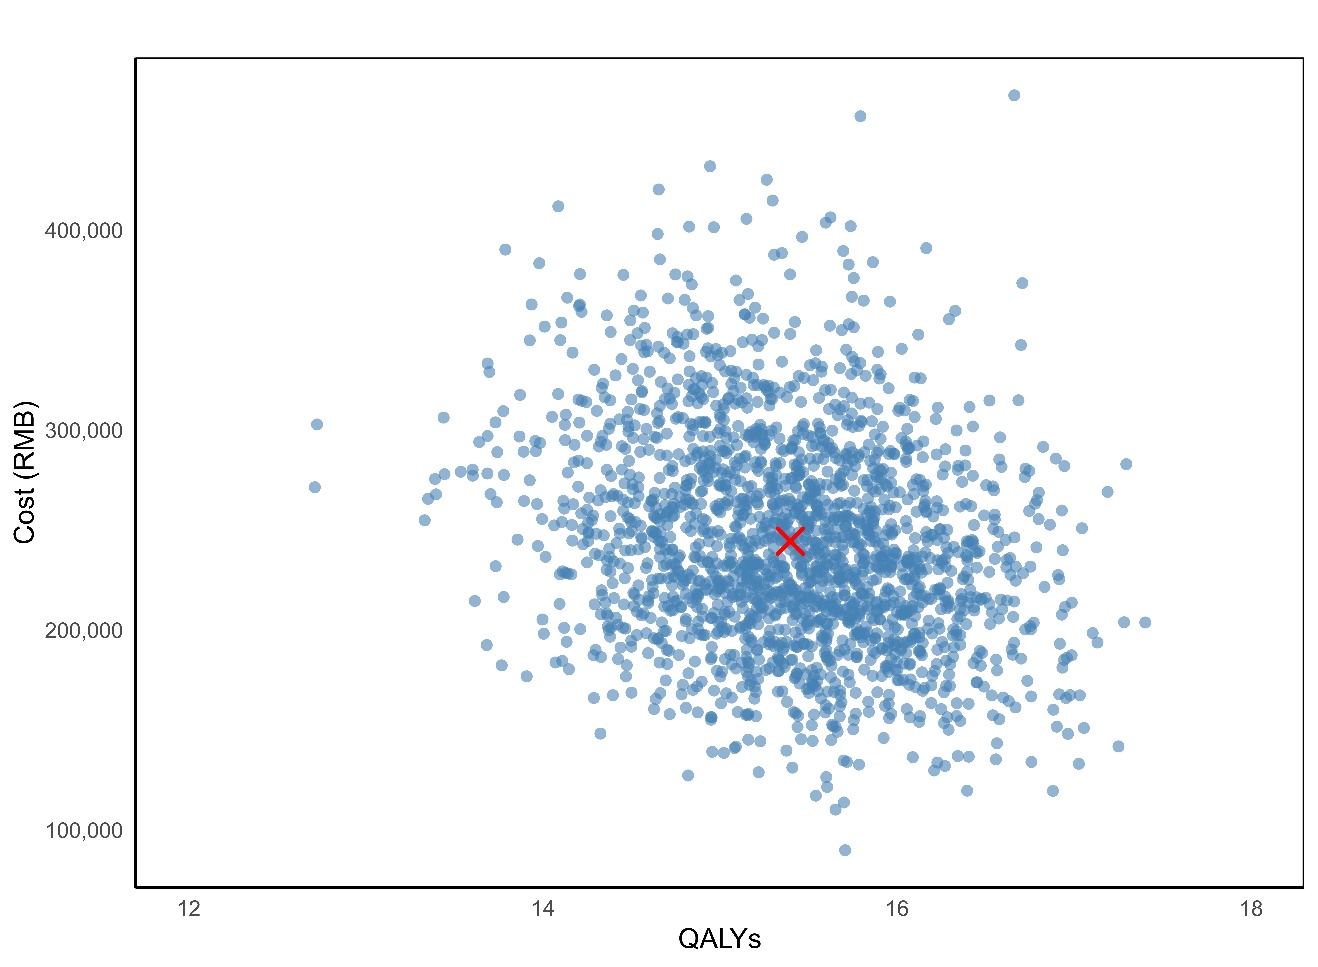
**Figure S1. Probability sensitivity analysis result

**Table S1.** Markov Cost Analysis of Three-Tier Screening for CHD in Children in High-Altitude Regions.

|  | Cost(RMB) | QALYs | ΔC(RMB) | ΔQALYs(RMB) | ICUR |
| --- | --- | --- | --- | --- | --- |
| Three-tier screening | 2604 | 0.060 | / | / | / |
| Rescreening + Diagnosis | 2694 | 0.055 | 90 | 0.00 | -20870 |
| Diagnosis | 15400 | 0.001 | 12706 | -0.05 | -234137 |

Table S2. Markov Cost Analysis Parameters

| [Parameter](https://www.copilot.com/chats/ca://s?q=Explain_PSA_parameter_definition) | [Base Value](https://www.copilot.com/chats/ca://s?q=What_is_base_value_in_cost_effectiveness) | [Distribution](https://www.copilot.com/chats/ca://s?q=PSA_distribution_types_explained) | [Distribution Parameters](https://www.copilot.com/chats/ca://s?q=How_to_set_distribution_parameters_in_PSA) | [Source](https://www.copilot.com/chats/ca://s?q=How_to_cite_sources_in_health_economics) |
| --- | --- | --- | --- | --- |
| Screening test sensitivity | 0.92 | Beta | α=92, β=8 | Model assumption |
| Screening test specificity | 0.89 | Beta | α=89, β=11 | Model assumption |
| Probability of early detection | 0.30 | Beta | α=30, β=70 | Model assumption |
| Probability of late detection | 0.10 | Beta | α=10, β=90 | Model assumption |
| Annual transition: Symptomless→ Early-stage | 0.10 | Beta | α=10, β=90 | Literature[1] |
| Annual transition: Symptomless → Late-stage | 0.05 | Beta | α=5, β=95 | Literature[1] |
| Annual transition: Early → Late-stage | 0.20 | Beta | α=20, β=80 | Literature[1] |
| Cost: Healthy | 200 | Gamma | shape=200²/40², scale=40²/200 | Local data |
| Cost: Early detection | 2,000 | Gamma | shape=2000²/400², scale=400²/2000 | Local data |
| Cost: Late detection | 20,000 | Gamma | shape=20000²/4000², scale=4000²/20000 | Local data |
| Utility: Healthy | 0.95 | Beta | α=95, β=5 | Literature[2] |
| Utility: Early detection | 0.85 | Beta | α=85, β=15 | Literature[3] |
| Utility: Late detection | 0.65 | Beta | α=65, β=35 | Literature[4] |
| WTP threshold | 50,000 | Uniform | 0~50,000 | Literature[5] |

[1] SU Z H, LI S J, CHEN H W, et al. [Comparison of Trends in Congenital Heart Disease Mortality from 1990 to 2017 Between China and North America] [J]. 2021, 49(3):269-275.

[2] MILLER A, RIEHLE-COLARUSSO T, SIFFEL C, et al. Maternal age and prevalence of isolated congenital heart defects in an urban area of the United States [J]. 2011, 155(9):2137-2145.

[3] SANDBERG C, ENGSTROM K G, DELLBORG M, et al. The Level of Physical Exercise is Associated with Self-Reported Health Status (EQ-5D) in Adults with Congenital Heart Disease [J]. 2015, 22(2).

[4] GöHLER A, GEISLER B P, MANNE J M, et al. Utility Estimates for Decision–Analytic Modeling in Chronic Heart Failure—Health States Based on New York Heart Association Classes and Number of Rehospitalizations [J]. Value in Health, 2009, 12(1):185-187.

[5] LOU Y, WU Y, LI X, et al. Cost-effectiveness of Qiliqiangxin in HFrEF: adjunctive therapy vs. standard care from a Chinese healthcare perspective [J]. BMC Complement Med Ther, 2025, 25(1):437.
